CORRECTION

# Correction: Soil Penetration by Earthworms and Plant Roots—Mechanical Energetics of Bioturbation of Compacted Soils

The PLOS ONE Staff

[Fig 13](#) is incorrect. The authors have provided a corrected version here.

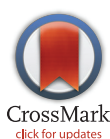

## OPEN ACCESS

**Citation:** The PLOS ONE Staff (2015) Correction: Soil Penetration by Earthworms and Plant Roots—Mechanical Energetics of Bioturbation of Compacted Soils. PLoS ONE 10(9): e0136225. doi:10.1371/journal.pone.0136225

**Published:** September 1, 2015

**Copyright:** © 2015 The PLOS ONE Staff. This is an open access article distributed under the terms of the [Creative Commons Attribution License](#), which permits unrestricted use, distribution, and reproduction in any medium, provided the original author and source are credited.

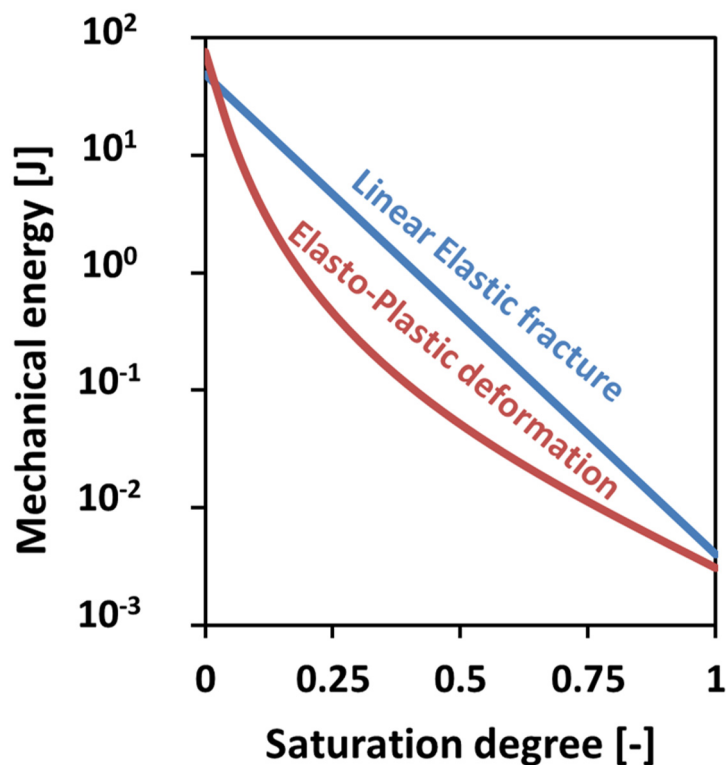

**Fig 13. Mechanical energy to create a burrow of 1 m length and 1.2 mm radius as a function of normalized water content using a penetration model and a fracture model.** Both models were conducted for a worm of  $r = 1.2$  mm [50] for soils with clay contents ranging from 15–25% [21, 50–52].

doi:10.1371/journal.pone.0136225.g001

## Reference

1. Ruiz S, Or D, Schymanski SJ (2015) Soil Penetration by Earthworms and Plant Roots—Mechanical Energetics of Bioturbation of Compacted Soils. PLoS ONE 10(6): e0128914. doi: [10.1371/journal.pone.0128914](https://doi.org/10.1371/journal.pone.0128914) PMID: [26087130](https://pubmed.ncbi.nlm.nih.gov/26087130/)
